# Supplementary material
Source: PubMed Central journal article supplement (PMC4409559)

Figure S.2A

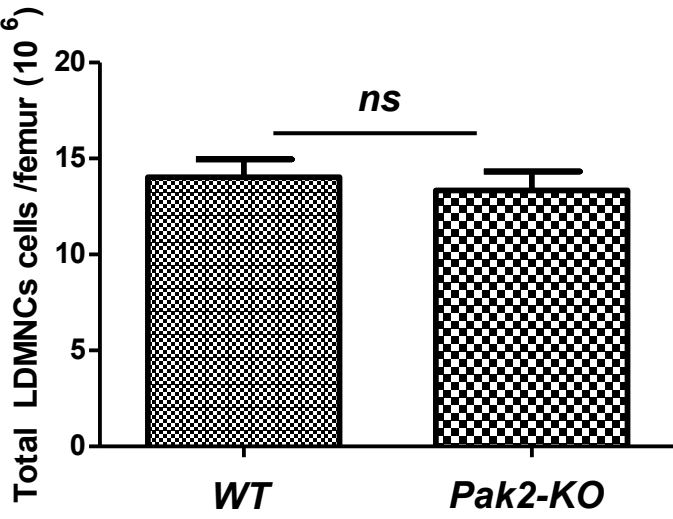

Figure S.2B

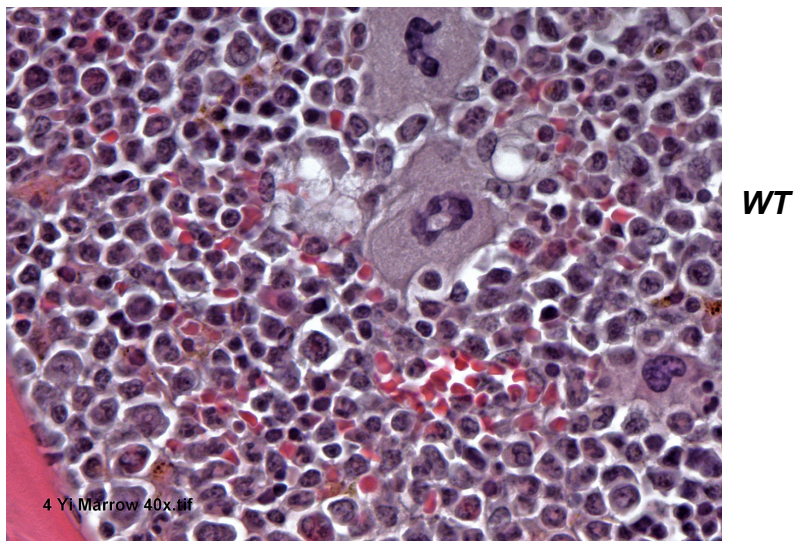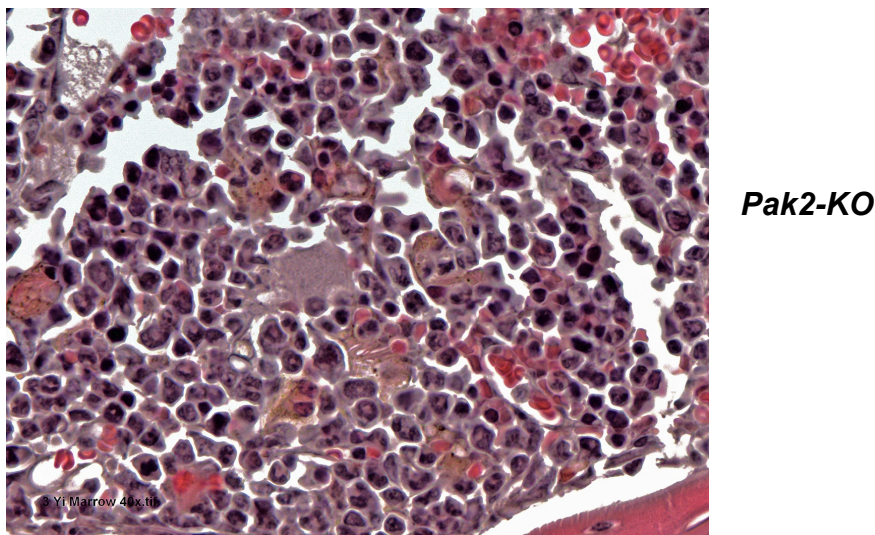

Supplement: NIHMS672761-supplement-Figure_S_2A_-_S_2B.pdf [file NIHMS672761-supplement-Figure_S_2A_-_S_2B.pdf]

**Figure S.4**

**WT**

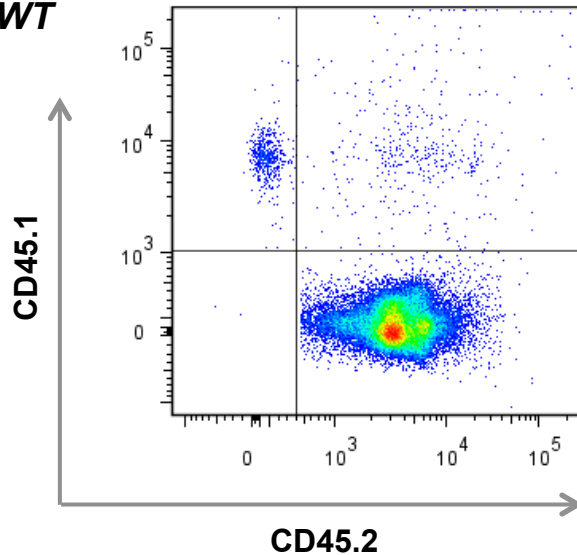

**CD45.2<sup>+</sup> gate**

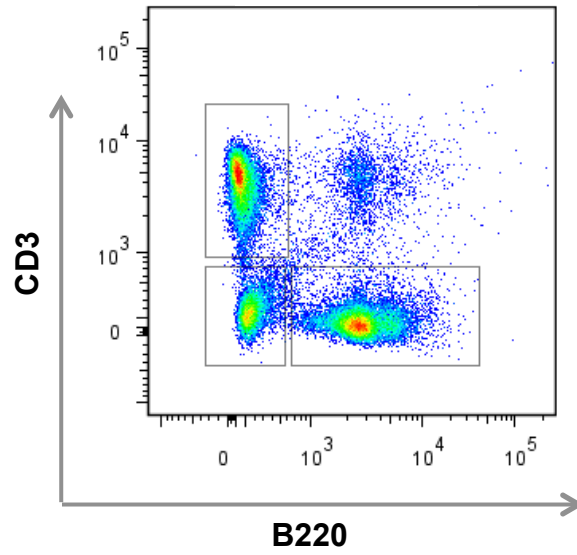

**B220-CD3<sup>-</sup> gate**

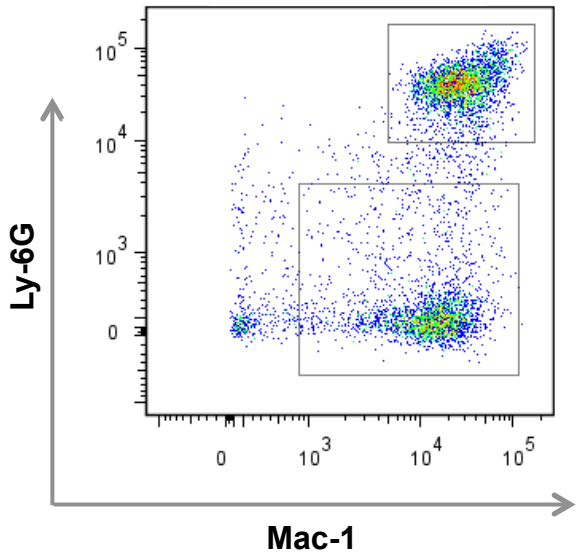

**Pak2-KO**

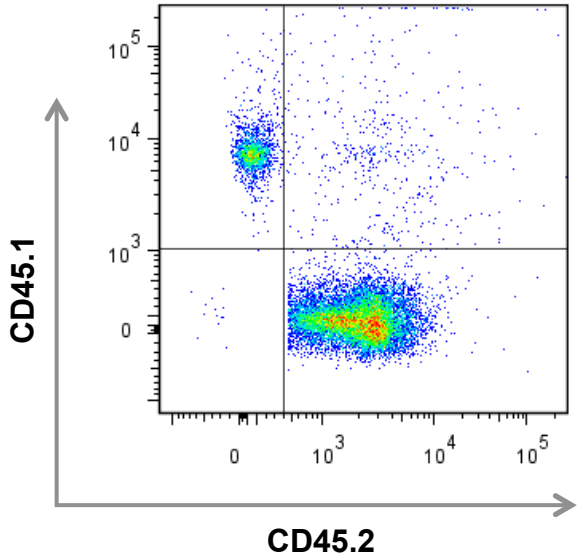

**B220**

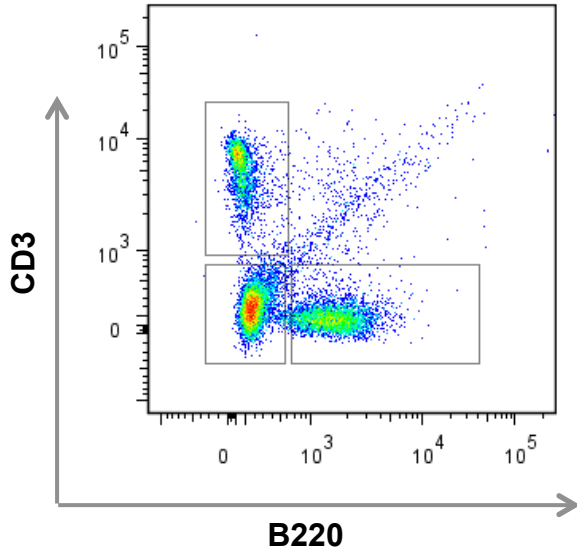

**Mac-1**

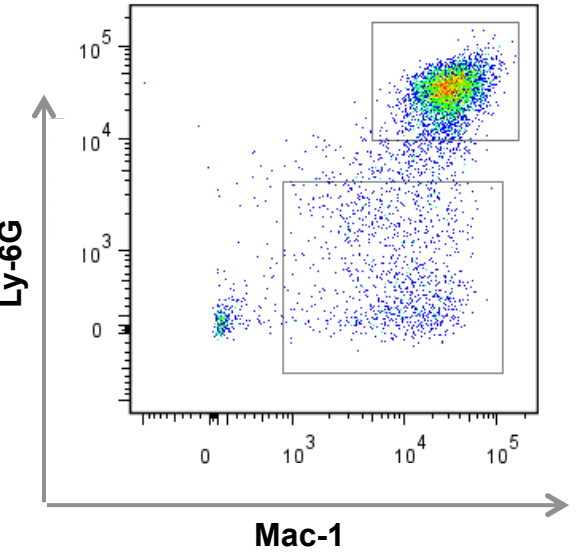

Supplement: NIHMS672761-supplement-Figure_S_4.pdf [file NIHMS672761-supplement-Figure_S_4.pdf]

Figure S.6

(A) GM-CSF

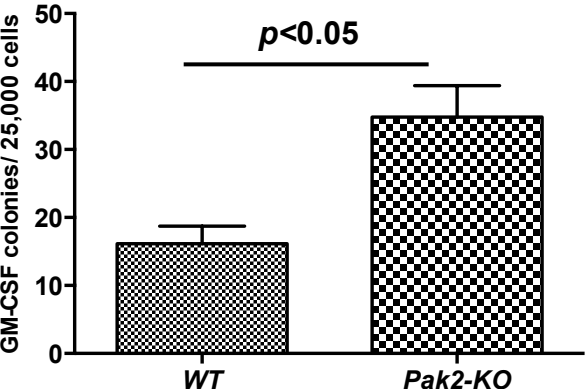

(B) G-CSF

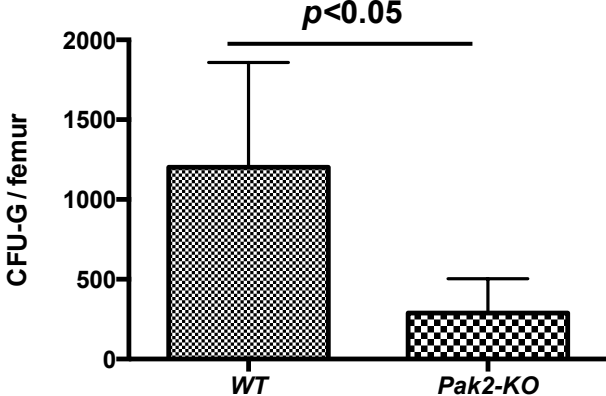

(C) IL-3

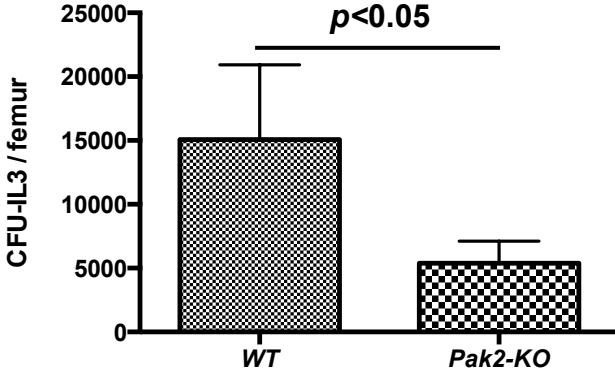

(D) SCF

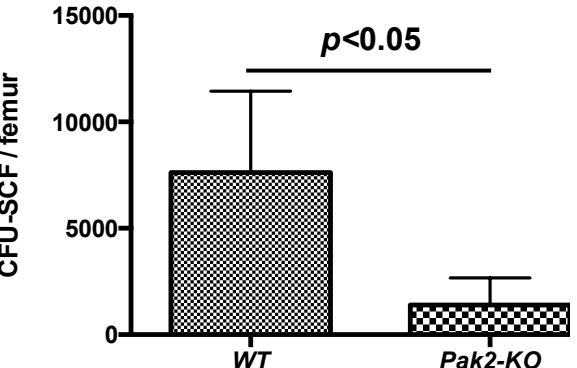

(E) M-CSF

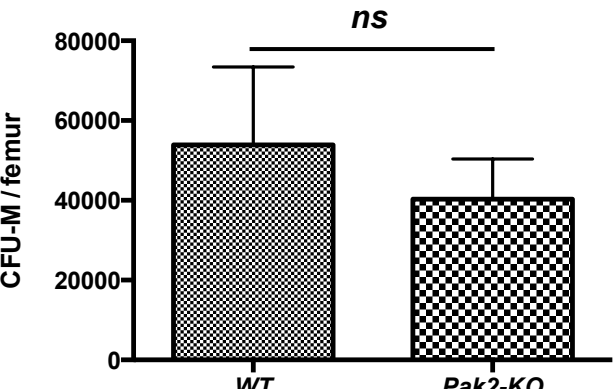

Supplement: NIHMS672761-supplement-Figure_S_6.pdf [file NIHMS672761-supplement-Figure_S_6.pdf]
